# Supplementary material
Source: PubMed Central journal article supplement (PMC4157315)
Supplement: NIHMS617450-supplement-1.pdf [file NIHMS617450-supplement-1.pdf]

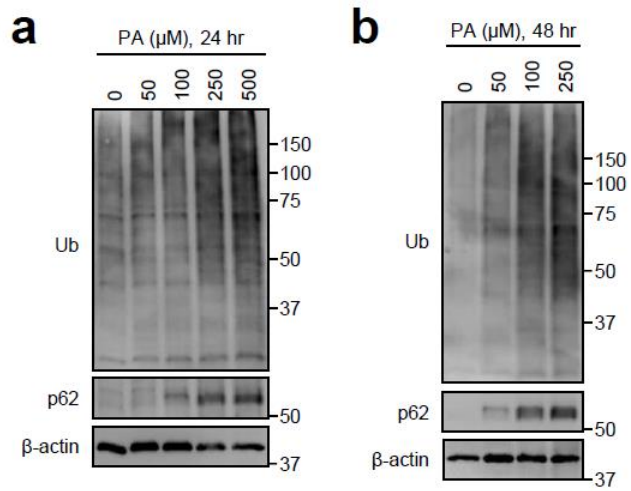

**Supplementary Figure 1 | Palmitic acid-induced accumulation of ubiquitin and p62 is dose- and time-dependent.** (a,b) HepG2 cells were treated with indicated concentrations of palmitic acid (PA) for 24 hr (a) and 48 hr (b) and analyzed by immunoblotting. Molecular weight markers are indicated in kDa.

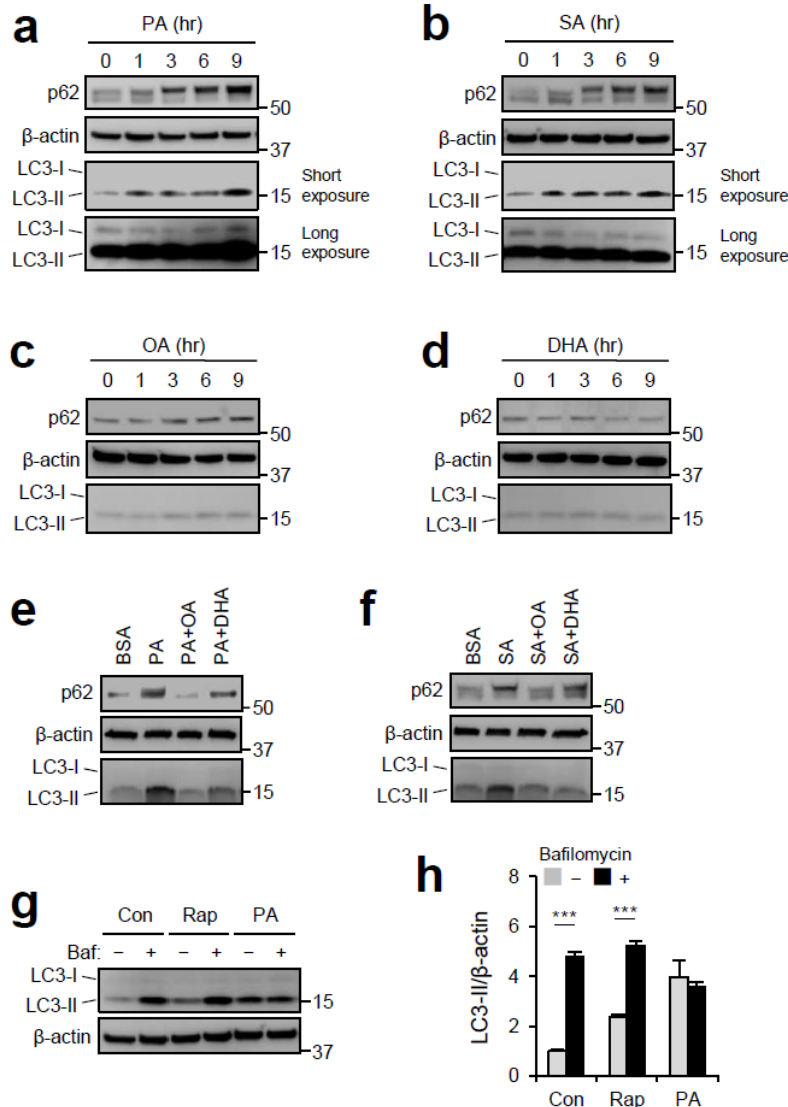

**Supplementary Figure 2 | Saturated fatty acids, but not unsaturated fatty acids, induce accumulation of p62 and LC3.** (a-f) HepG2 cells were treated with BSA, PA, stearic acid (SA), oleic acid (OA) and/or docosahexaenoic acid (DHA) (500  $\mu$ M) for indicated hr (a-d) or 9 hr (e,f) and analyzed by immunoblotting. (g,h) Cells were treated with BSA (Con), rapamycin (Rap, 100 nM) or PA (500  $\mu$ M) for 9 hr. Bafilomycin (Baf, 100 nM) was treated for last 3 hr as indicated. Cell lysates were analyzed by immunoblotting (g) and quantified through densitometry (h,  $n = 3$ ). All data are shown as mean  $\pm$  s.e.m. \*\*\* $P < 0.001$  (Student's t test). Molecular weight markers are indicated in kDa.

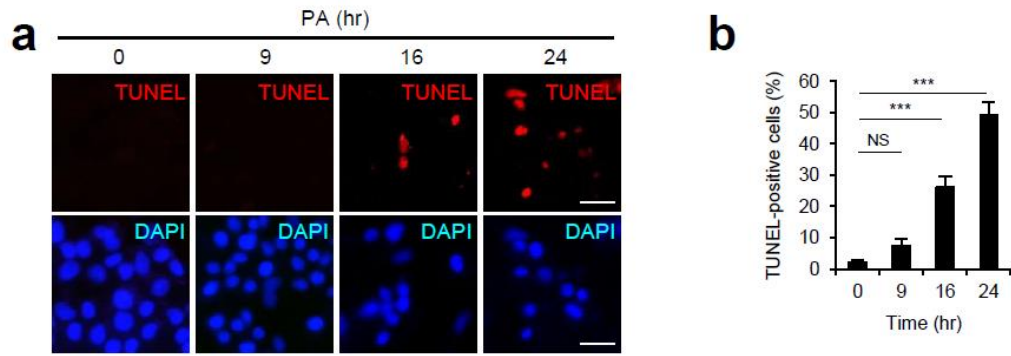

**Supplementary Figure 3 | The effect of palmitic acid on HepG2 cell apoptosis. (a,b)** HepG2 cells were treated with 500  $\mu$ M palmitic acid (PA) for indicated hr and analyzed by TUNEL (red) and DAPI (blue) staining (**a**). TUNEL-positive cells were quantified (**b**,  $n = 3$ ). Scale bar, 20  $\mu$ m. All data are shown as mean  $\pm$  s.e.m. \*\*\* $P < 0.001$  (Student's t test).

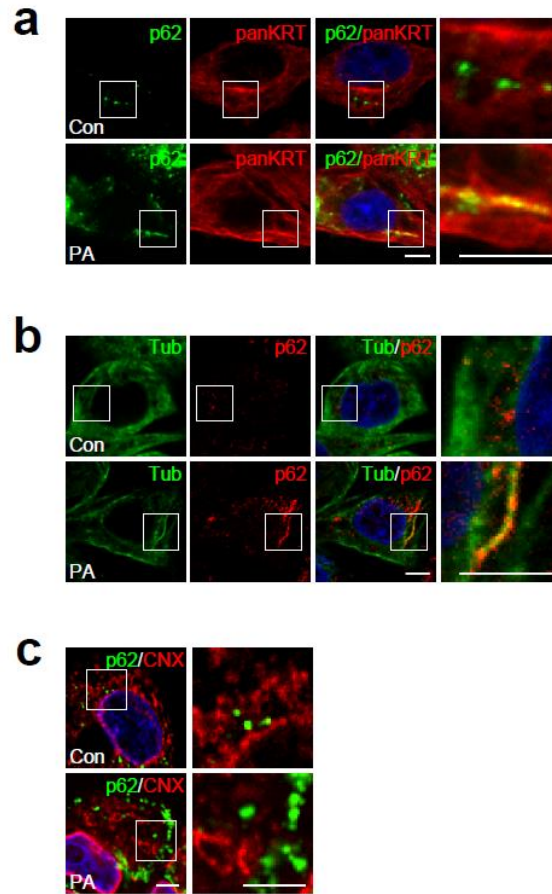

**Supplementary Figure 4 | Palmitic acid-induced protein inclusion associates with keratin and tubulin fibers but not with ER.** (a-c) HepG2 cells were treated with BSA (Con) or 500  $\mu$ M palmitic acid (PA) for 9 hr and stained with p62, pan-keratin (panKRT), tubulin (Tub) and calnexin (CNX, an ER and outer nuclear envelop membrane marker) antibodies and DAPI (blue). Boxed areas are magnified in right-most panels. Scale bars, 5  $\mu$ m.

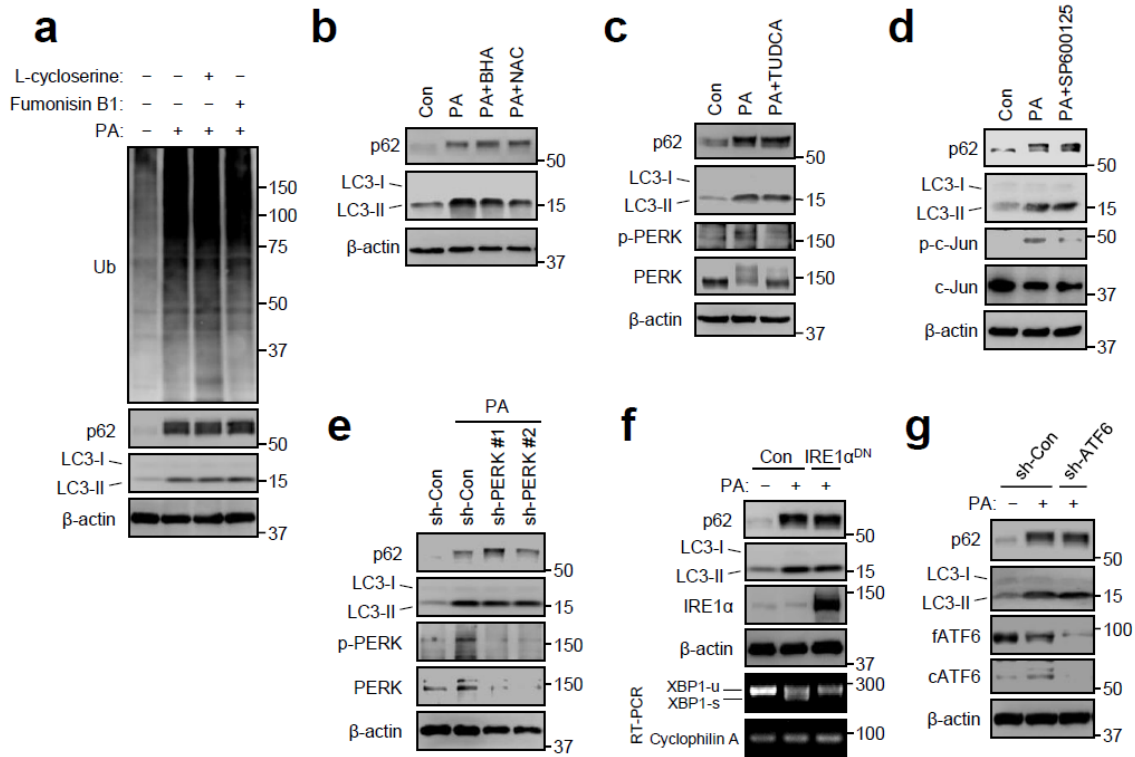

**Supplementary Figure 5 | Ceramides, oxidative stress, ER stress and JNK signaling do not mediate palmitic acid-induced p62 accumulation.** (a-d) Effects of ceramide synthesis inhibitors, L-cycloserine (100  $\mu\text{M}$ ) and fumonisin B1 (10  $\mu\text{M}$ ) (a), antioxidants, butylated hydroxyanisole (BHA, 100  $\mu\text{M}$ ) and N-acetylcysteine (NAC, 10 mM) (b), a chemical chaperone TUDCA (500  $\mu\text{g/ml}$ ) (c) or a JNK inhibitor SP600125 (50  $\mu\text{M}$ ) (d) on PA-induced accumulation of ubiquitinated proteins (a), p62 and LC3-II (a-d) were analyzed through immunoblotting. L-cycloserine, fumonisin B1, BHA, NAC, TUDCA and SP600125 were all treated 1 hr before 9 hr of PA treatment. (e-g) Effects of ER stress signaling inhibition on PA-induced accumulation of p62 and LC3-II were analyzed through immunoblotting. At 48 hr after infection with lentiviruses expressing GFP (Con) and dominant-negative IRE1 $\alpha$  (IRE1 $\alpha^{\text{DN}}$ ) (f) or shRNAs targeting luciferase (sh-Con), PERK (e) or ATF6 (g), cells were treated with BSA (-) or PA for 9 hr. XBP1-u, unspliced XBP1; XBP1-s, spliced XBP1; fATF6, full-length ATF6; cATF6, cleaved ATF6. Molecular weight markers are indicated in kDa.

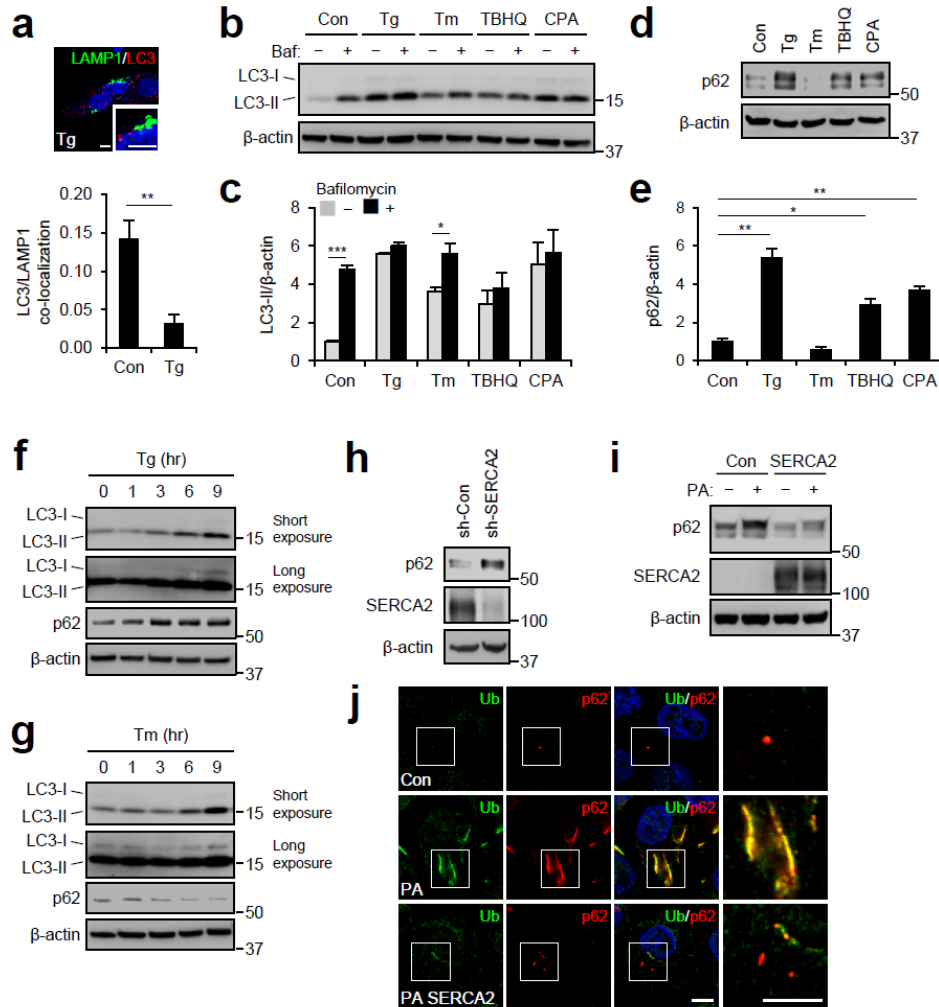

**Supplementary Figure 6 | Palmitic acid impairs autophagy through inhibition of SERCA.** (a) HepG2 cells were treated with thapsigargin (Tg) for 9 hr and subjected to immunostaining with LAMP1 and LC3 antibodies (upper panel). Co-localization between LAMP1 and LC3 was quantified and compared to untreated (Con) cells (lower panel) ( $n = 4$ ). (b-e) Cells were treated with DMSO (Con), Tg (1  $\mu$ M), tunicamycin (Tm, 5  $\mu$ g/ml), tert-butylhydroquinone (TBHQ, 50  $\mu$ M) or cyclopiiazonic acid (CPA, 50  $\mu$ M) for 9 hr. Bafilomycin (Baf, 100 nM) was treated for last 3 hr as indicated. Cell lysates were analyzed by immunoblotting (b,d) and quantified through densitometry (c,e) ( $n = 3$ ). (f,g) Cells were treated with Tg (1  $\mu$ M) or Tm (5  $\mu$ g/ml) for indicated hr and analyzed by immunoblotting. (h) Cells were transduced with adenoviruses expressing shRNA targeting luciferase (sh-Con) or SERCA2b (sh-SERCA2b). At 48 hr after transduction, cells were analyzed by immunoblotting. (i,j) Cells were transduced with control or SERCA2b-overexpressing adenoviruses. At 48 hr after transduction, cells were treated with BSA (-) or PA (500  $\mu$ M) for 9 hr and subjected to immunoblotting (i) or immunostaining (j). DNA was visualized by DAPI (blue). Boxed areas in fluorescence images are magnified in right-most panels. Scale bars, 5  $\mu$ m. All data are shown as mean  $\pm$  s.e.m. \* $P < 0.05$ , \*\* $P < 0.01$ , \*\*\* $P < 0.001$  (Student's t test). Molecular weight markers are indicated in kDa.

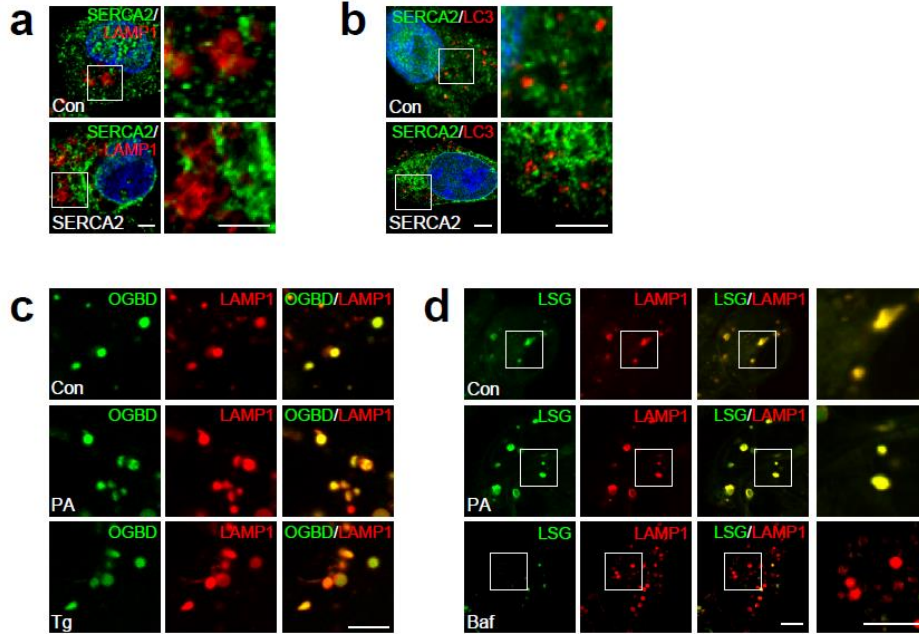

**Supplementary Figure 7 | Palmitic acid does not affect lysosomal calcium and proton homeostasis.** (a,b) HepG2 cells were either untreated (Con) or transduced with adenoviruses overexpressing SERCA2b. Endogenous and overexpressed SERCA2 proteins were visualized by immunostaining. Lysosomes were visualized by anti-LAMP1 immunostaining (a). Autophagosomes were visualized by anti-LC3 immunostaining (b). DNA was visualized by DAPI (blue). (c,d) Cells were transduced with lentiviruses expressing LAMP1-mRFP that labels lysosomes. (c) Two days after transduction, cells were treated with BSA (Con), PA (500  $\mu$ M) or Tg (1  $\mu$ M) for 9 hr and loaded with Oregon Green 488 BAPTA-1-dextran (OGBD), a calcium indicator that accumulates in lysosomes. OGBD's fluorescence intensity is proportional to calcium concentration in lysosome lumen<sup>1</sup>. (d) Two days after transduction, cells were treated with BSA, PA or bafilomycin (Baf, 100 nM) for 9 hr and loaded with LysoSensor Green (LSG), a pH indicator that labels lysosomes. LysoSensor's fluorescence intensity is proportional to proton concentration in lysosome lumen<sup>2</sup>. Bafilomycin is an inhibitor of lysosomal proton pump, therefore was used as a positive control. Boxed areas in fluorescence images are magnified in right-most panels. Scale bars, 5  $\mu$ m.

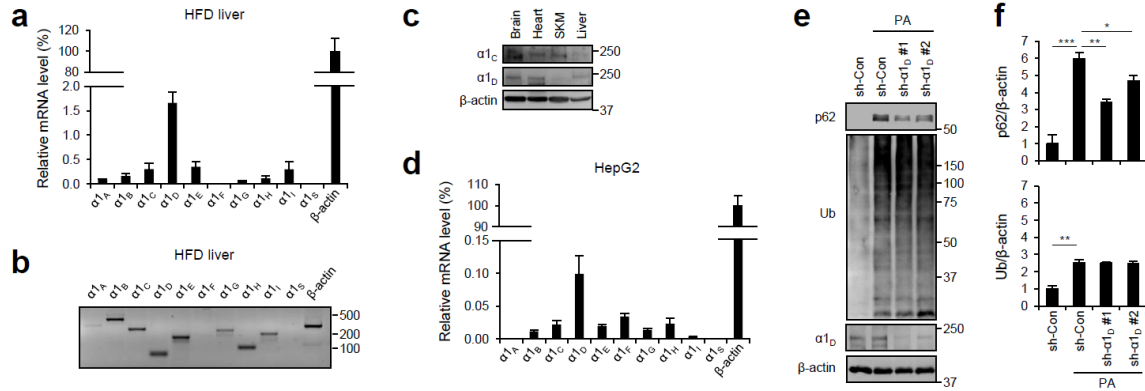

**Supplementary Figure 8 |  $\alpha_{1D}$ / $Ca_v1.3$  is expressed in hepatocytes and plays a role in palmitic acid-induced p62 inclusion.** (a,b) mRNA expressions of calcium channel isoforms were analyzed by qRT-PCR from livers of obese mice on HFD (a). Endpoint PCR products were analyzed by agarose gel running (b). (c) Expression of  $\alpha_{1C}$ / $Ca_v1.2$  and  $\alpha_{1D}$  proteins were examined from brain, heart, skeletal muscle (SKM) and liver lysates by immunoblotting. (d) mRNA expression of calcium channel isoforms were analyzed by qRT-PCR from HepG2 cells. (e,f) At 48 hr before PA treatment, HepG2 cells were infected with lentiviruses expressing shRNAs targeting luciferase (sh-Con) or  $\alpha_{1D}$  and their insoluble fractions were subjected to immunoblotting with anti-p62, anti-ubiquitin and anti-actin antibodies (e).  $\alpha_{1D}$  expression was examined from soluble fractions. Levels of p62 and ubiquitinated proteins were quantified (f) ( $n = 3$ ). All data are shown as mean  $\pm$  s.e.m. \* $P < 0.05$ , \*\* $P < 0.01$ , \*\*\* $P < 0.001$  (Student's t test). Molecular weight markers are indicated in kDa.



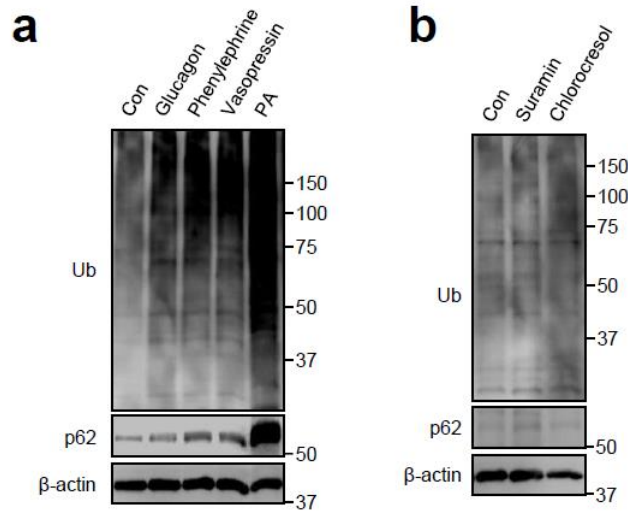

**Supplementary Figure 9 | Activation of IP3 receptor, but not ryanodine receptor, resulted in modest accumulation of ubiquitinated proteins and p62.** (a,b) HepG2 cells were treated with glucagon (100 nM), phenylephrine (100  $\mu$ M), vasopressin (1  $\mu$ M), suramin (400  $\mu$ M), chlorocresol (100  $\mu$ M) or PA (500  $\mu$ M) for 12 hr and analyzed by immunoblotting. Molecular weight markers are indicated in kDa.

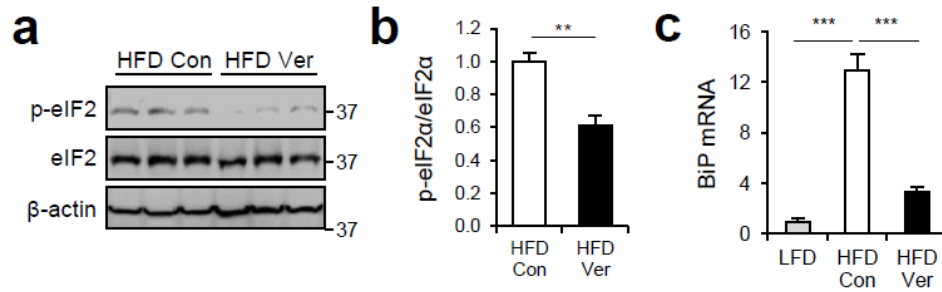

**Supplementary Figure 10 | Effects of verapamil on ER stress of mouse hepatocytes.** 4 month-old C57BL/6 male mice kept on HFD for two months were subjected to daily administration of PBS (Con,  $n = 4$ ) or verapamil (Ver, 25 mg/Kg body weight, i.p.,  $n = 3$ ) for 10 days. LFD-kept mice ( $n = 5$ ) of same age were used as a negative control. **(a-c)** Levels of eIF2 $\alpha$  phosphorylation from livers were analyzed by immunoblotting **(a)** and quantified **(b)**. Levels of BiP mRNA expression from livers were analyzed by qRT-PCR **(c)**. All data are shown as mean  $\pm$  s.e.m.  $**P < 0.01$ ,  $***P < 0.001$  (Student's t test). Molecular weight markers are indicated in kDa.

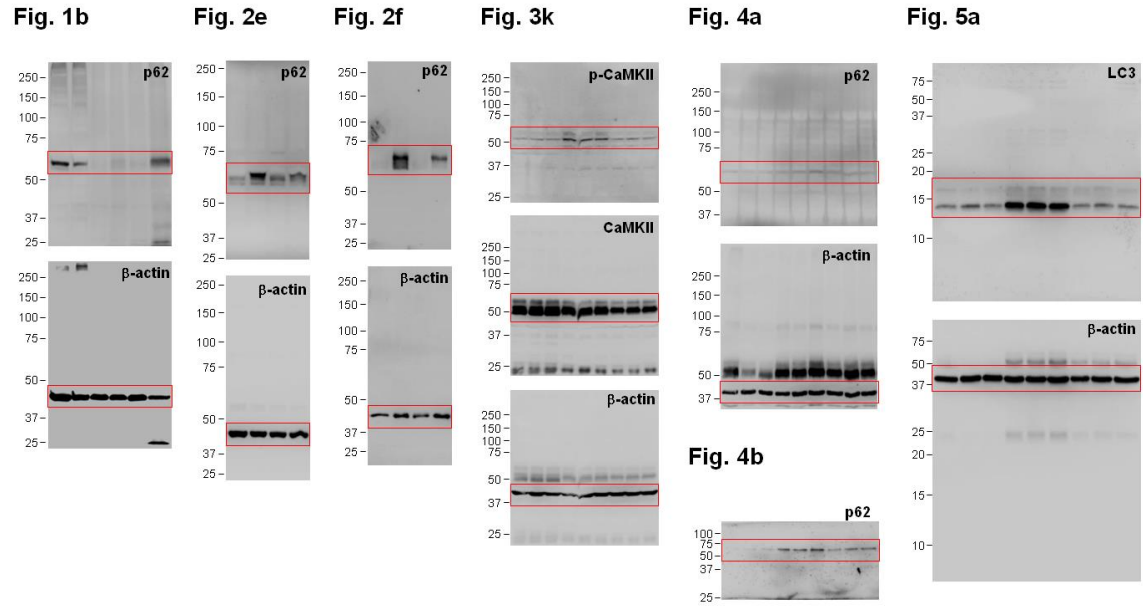

**Supplementary Figure 11 | Uncropped images of blots presented in the main paper.** Red boxes indicate the cropped regions. Molecular weight markers are indicated in kDa.

**Supplementary Table 1 | Effect of calcium channel blockers on metabolic homeostasis of humans and animals.**

*a. Positive effects of calcium channel blockers on metabolism.*

| <b>Compound</b>   | <b>Organism</b>                           | <b>Metabolic effects</b>       | <b>Refs.</b> |
|-------------------|-------------------------------------------|--------------------------------|--------------|
| Amlodipine        | Obese humans                              | Improved glucose tolerance     | 3            |
|                   | Hypertensive humans                       | Increased insulin sensitivity  | 4            |
|                   | Obese humans                              | Reduced insulin resistance     | 5, 6         |
| Azelnidipine      | Hypertensive humans                       | Improved glucose tolerance     | 7            |
| Benidipine        | Hypertensive humans                       | Improved insulin resistance    | 8            |
| Cilnidipine       | Obese humans                              | Reduced insulin resistance     | 5            |
| Isradipine        | SHR rats                                  | Improved insulin sensitivity   | 9            |
| Lercanidipine     | CRDH rats                                 | Reduced blood glucose level    | 10           |
| Manidipine        | T2DM humans                               | Increased insulin sensitivity  | 11           |
|                   | Obese humans                              | Reduced insulin resistance     | 5            |
| Nifedipine        | CHD patients with LGT<br>NASH mice on MCD | Reduced blood glucose level    | 12           |
|                   |                                           | Reduced liver damage           | 13           |
|                   | Agouti-induced obese mice                 | Reduced fibrosis               | 14           |
|                   |                                           | Reduced obesity                |              |
|                   | SHHF obese rats                           | Improved insulin sensitivity   | 15           |
| STZ-injected rats | Improved insulin response                 | 16                             |              |
| Nisoldipine       | STZ-injected SHR rats                     | Reduced hyperglycemia          | 17           |
|                   |                                           | Reduced hyperlipidemia         |              |
| Nitrendipine      | Obese humans                              | Reduced blood glucose level    | 18, 19       |
|                   |                                           | Reduced insulin resistance     |              |
|                   |                                           | Reduced hyperinsulinemia       |              |
| Verapamil         | SHR rats                                  | Improved glucose tolerance     | 20           |
|                   |                                           | Improved glucose tolerance     |              |
|                   |                                           | Improved glucose tolerance     |              |
| Verapamil         | T2DM humans                               | Reduced insulin resistance     | 21, 22, 23,  |
|                   |                                           | Reduced blood glucose level    |              |
|                   |                                           | Reduced blood glucose turnover |              |
|                   | Obese humans                              | Reduced hyperinsulinemia       | 24           |
|                   |                                           | Improved glucose tolerance     | 25           |
|                   | Obese <i>ob/ob</i> mice                   | Reduced hyperinsulinemia       | 26           |
|                   |                                           | Improved glucose tolerance     | 27           |
|                   |                                           | Improved insulin sensitivity   |              |

SHR, Spontaneously Hypertensive; CRDH, Cohen Rosenthal Diabetic Hypertensive; T2DM, Type 2 Diabetes Mellitus (also known as NIDDM); CHD, Coronary Heart Disease; LGT, Low Glucose Tolerance; NASH, Non-Alcoholic Steatohepatitis; MCD, Methionine-Choline-deficient Diet; SHHF, Spontaneously Hypertensive Heart Failure; STZ, streptozotocin;

*b. Neutral or negative effects of calcium channel blockers on metabolism.*

| <b>Compound</b> | <b>Organism</b>         | <b>Metabolic effects</b>                                                   | <b>Refs.</b> |
|-----------------|-------------------------|----------------------------------------------------------------------------|--------------|
| CCB in general  | Hypertensive humans     | No effects on incidental diabetes                                          | 28           |
| Amlodipine      | Hypertensive humans     | No effects on blood lipid level                                            | 29           |
| Diltiazem       | Hypertensive humans     | No effects on insulin sensitivity                                          | 30           |
| Felodipine      | Hypertensive humans     | No effects on blood glucose level<br>No effects on blood lipid level       | 31           |
|                 | T2DM humans             | No effects on blood glucose level                                          | 32           |
| Nicardipine     | T2DM humans             | No effects on glucose tolerance                                            | 33           |
|                 | Hypertensive humans     | No effects on blood lipid profile                                          | 34           |
| Nifedipine      | Obese <i>cp/cp</i> rats | No effects on blood glucose level<br>Slight increase in insulin level      | 35           |
|                 | Dogs                    | No effects on blood glucose level<br>Slight decrease in insulin level      | 36           |
| Nitrendipine    | Hypertensive humans     | No effects on blood glucose level<br>No effects on blood lipid level       | 37           |
| Verapamil       | Healthy humans          | No effect on glucose tolerance                                             | 38           |
|                 |                         | No effect on basal glucose level<br>Slight decrease in insulin sensitivity | 39           |
|                 |                         | Induction of hyperglycemia                                                 |              |
|                 | Healthy dogs            | Systemic insulin resistance*                                               | 40           |
|                 | Nondiabetic rats        | Induction of glucose intolerance                                           | 41           |

CCB, Calcium Channel Blocker; T2DM, Type II Diabetes Mellitus; \*, treated with toxic concentration of verapamil

**Supplementary Table 2 | Primers used in this study**

| <b>Gene</b>            | <b>Forward</b>             | <b>Reverse</b>          | <b>Refs.</b> |
|------------------------|----------------------------|-------------------------|--------------|
| Adiponectin            | TGTTCTCTTAATCCTGCCCA       | CCAACCTGCACAAGTTCCCTT   | 42           |
| TNF $\alpha$           | AGGGTCTGGGCCATAGAACT       | CCACCACGCTCTTCTGTCTAC   | 43           |
| Interleukin-6          | ACCAGAGGAAATTTCAATAGGC     | GATGCACTTGCAGAAAACA     | 43           |
| mouse BiP              | GGTGCAGCAGGACATCAAGTT      | CCCACCTCCAATATCAACTTGA  | 44           |
| mouse $\alpha 1_A$     | CACCGAGTTGGGAATAACTTCA     | ATTGTGCTCCGTGATTGGAA    | 42           |
| mouse $\alpha 1_B$     | AAGTGGCATCAAGGAGTCGC       | GCTAGGCGTGGCATAGAGG     | 42           |
| mouse $\alpha 1_C$     | ATGAAAACACGAGGATGTACGTT    | ACTGACGGTAGAGATGGTTGC   | 42           |
| mouse $\alpha 1_D$     | AGAGGACCATGCGAACGAG        | CCTTCACCAGAAATAGGGAGTCT | 42           |
| mouse $\alpha 1_E$     | GATGGAGACTCGGACCAGAG       | TGACCGTGAAACAGTTCTGCC   | 42           |
| mouse $\alpha 1_F$     | ATGTCCGAATCTGAAGTCGGG      | ACCGCCACAGTCTTGTGTTT    | 42           |
| mouse $\alpha 1_G$     | TGTCTCCGCACGGTCTGTAA       | AGATACCCAAAGCGACCATCTT  | 42           |
| mouse $\alpha 1_H$     | GAACGTGGTTCTTTACAACGGC     | GCACATAGTTCCCAAAGGTCA   | 42           |
| mouse $\alpha 1_I$     | GGGCGTGGCCTGTTTAGTC        | TGAGGGTCTCGGAGTGCTC     | 42           |
| mouse $\alpha 1_S$     | CAGCGGGGACTGTATTGC         | TGTGGCACACCTGAAGAGC     | 42           |
| mouse $\beta$ -actin   | CAAAGCCACCCCACTCCTAAG<br>A | GCCCTGGCTGCCTCAACACCTC  | 45           |
| human $\alpha 1_A$     | CGCTTCGGAGACGAGATGC        | TGCGCCATTGACTGCTTGT     | 42           |
| human $\alpha 1_B$     | GACAACGTCGTCCGCAAATAC      | CCCGATGAAATAGGGCTCCG    | 42           |
| human $\alpha 1_C$     | GAAGCGGCAGCAATATGGGA       | TTGGTGGCGTTGGAATCATCT   | 42           |
| human $\alpha 1_D$     | TCAGCCGAATAGCTCCAAGC       | TCGGATGGGGTTATTGAGTGA   | 42           |
| human $\alpha 1_E$     | CCATGTCCCGAAGACTGGAGA      | CCATTGCGGAGGTAAGAGC     | 42           |
| human $\alpha 1_F$     | CCATGTCCCGAAGACTGGAGA      | CCATTGCGGAGGTAAGAGC     | 42           |
| human $\alpha 1_G$     | TGTCTCCGCACGGTCTGTAA       | AAGCCGGTTCCAAGTGTCTC    | 42           |
| human $\alpha 1_H$     | ATGCTGGTAATCATGCTCAACTG    | AAAAGGCGAAAATGAAGGCGT   | 42           |
| human $\alpha 1_I$     | GGAGCTGATCCTCATGTCCC       | CACGGGTTGCACACCATCT     | 42           |
| human $\alpha 1_S$     | TTGCCTACGGCTTCTTATTCCA     | GTTCCAGAATCACGGTGAAGAC  | 42           |
| human XBP1             | TTACGAGAGAAAATCATGGC       | GGTCCAAGTTGTCCAGAATGC   | 46           |
| human<br>cyclophilin A | GCAAAGTGAAAGAAGGCATGAA     | CCATTCTGGACCCAAAGC      | 47           |

## Supplementary References

1. Christensen KA, Myers JT, Swanson JA. pH-dependent regulation of lysosomal calcium in macrophages. *J Cell Sci* **115**, 599-607 (2002).
2. Lin HJ, Herman P, Kang JS, Lakowicz JR. Fluorescence lifetime characterization of novel low-pH probes. *Anal Biochem* **294**, 118-125 (2001).
3. Beer NA, Jakubowicz DJ, Beer RM, Nestler JE. The calcium channel blocker amlodipine raises serum dehydroepiandrosterone sulfate and androstenedione, but lowers serum cortisol, in insulin-resistant obese and hypertensive men. *J Clin Endocrinol Metab* **76**, 1464-1469 (1993).
4. Harano Y, *et al.* Improvement of insulin sensitivity for glucose metabolism with the long-acting Ca-channel blocker amlodipine in essential hypertensive subjects. *Metabolism* **44**, 315-319 (1995).
5. Ueshiba H, Miyachi Y. Effects of the long-acting calcium channel blockers, amlodipine, manidipine and cilnidipine on steroid hormones and insulin resistance in hypertensive obese patients. *Intern Med* **43**, 561-565 (2004).
6. Ueshiba H, Tsuboi K, Miyachi Y. Effects of amlodipine on serum levels of adrenal androgens and insulin in hypertensive men with obesity. *Horm Metab Res* **33**, 167-169 (2001).
7. Fukao K, *et al.* Effects of calcium channel blockers on glucose tolerance, inflammatory state, and circulating progenitor cells in non-diabetic patients with essential hypertension: a comparative study between azelnidipine and amlodipine on glucose tolerance and endothelial function--a crossover trial (AGENT). *Cardiovasc Diabetol* **10**, 79 (2011).
8. Suzuki M, Kanazawa A, Hasegawa M, Harano Y. Improvement of insulin resistance in essential hypertension by long-acting Ca antagonist benidipine. *Clin Exp Hypertens* **21**, 1327-1344 (1999).
9. Pitre M, Gaudreault N, Santure M, Nadeau A, Bachelard H. Isradipine and insulin sensitivity in hypertensive rats. *Am J Physiol* **276**, E1038-1048 (1999).

10. Rosenthal T, Rosenmann E, Tomassoni D, Amenta F. Effect of lercanidipine on kidney microanatomy in Cohen-Rosenthal diabetic hypertensive rats. *J Cardiovasc Pharmacol Ther* **12**, 145-152 (2007).
11. Suzuki S, *et al.* Effect of manidipine and delapril on insulin sensitivity in type 2 diabetic patients with essential hypertension. *Diabetes Res Clin Pract* **33**, 43-51 (1996).
12. Katsenovich RA, Trigulova R, Ovchinnikov, Kostko SZ. [Effect of corinfar on the course of angina pectoris and indices of carbohydrate metabolism in relation to the type of glucose tolerance]. *Ter Arkh* **59**, 35-38 (1987).
13. Nakagami H, *et al.* Nifedipine prevents hepatic fibrosis in a non-alcoholic steatohepatitis model induced by an L-methionine-and choline-deficient diet. *Mol Med Rep* **5**, 37-40 (2012).
14. Kim JH, Mynatt RL, Moore JW, Woychik RP, Moustaid N, Zemel MB. The effects of calcium channel blockade on agouti-induced obesity. *FASEB J* **10**, 1646-1652 (1996).
15. Radin MJ, Chu YY, Hoepf TM, McCune SA. Treatment of obese female and male SHHF/Mcc-fa(cp) rats with antihypertensive drugs, nifedipine and enalapril: effects on body weight, fat distribution, insulin resistance and systolic pressure. *Obes Res* **1**, 433-442 (1993).
16. Brown RA, Lee MM, Sundareson AM, Woodbury DJ, Savage AO. Influence of calcium channel blocker treatment on the mechanical properties of diabetic rat myocardium. *Acta Diabetol* **33**, 7-14 (1996).
17. Kusaka-Nakamura M, Kishi K, Miyazawa A, Yagi S, Sokabe H. Antihypertensive treatment in spontaneously hypertensive rats with streptozotocin-induced diabetes mellitus. *Acta Physiol Hung* **71**, 251-269 (1988).
18. Byyny RL, LoVerde M, Lloyd S, Mitchell W, Draznin B. Cytosolic calcium and insulin resistance in elderly patients with essential hypertension. *Am J Hypertens* **5**, 459-464 (1992).
19. Beer NA, Jakubowicz DJ, Beer RM, Arocha IR, Nestler JE. Effects of nitrendipine on glucose tolerance and serum insulin and dehydroepiandrosterone



- sulfate levels in insulin-resistant obese and hypertensive men. *J Clin Endocrinol Metab* **76**, 178-183 (1993).
20. Bursztyn M, Raz I, Mekler J, Ben-Ishay D. Nitrendipine improves glucose tolerance and deoxyglucose uptake in hypertensive rats. *Hypertension* **23**, 1051-1053 (1994).
  21. Lyngsoe J, Sorensen M, Sjostrand H, Sengelov H, Thrane MT, Holst J. The effect of sustained release verapamil on glucose metabolism in patients with non-insulin-dependent diabetes mellitus. *Drugs* **44 Suppl 1**, 85-87 (1992).
  22. Andersson DE, Rojdmarm S. Improvement of glucose tolerance by verapamil in patients with non-insulin-dependent diabetes mellitus. *Acta Med Scand* **210**, 27-33 (1981).
  23. Rojdmarm S, Andersson DE. Influence of verapamil on human glucose tolerance. *Am J Cardiol* **57**, 39D-43D (1986).
  24. Rojdmarm S, Andersson DE. Influence of verapamil on glucose tolerance. *Acta Med Scand Suppl* **681**, 37-42 (1984).
  25. Busch Sorensen M, Sjostrand H, Sengelov H, Tiefenthal Thrane M, Juul Holst J, Lyngsoe J. Influence of short term verapamil treatment on glucose metabolism in patients with non-insulin dependent diabetes mellitus. *Eur J Clin Pharmacol* **41**, 401-404 (1991).
  26. Fuenmayor NT, Moreira E, de los Rios V, Cevallos JL, Cubeddu LX. Relations between fasting serum insulin, glucose, and dihydroepiandrosterone-sulfate concentrations in obese patients with hypertension: short-term effects of antihypertensive drugs. *J Cardiovasc Pharmacol* **30**, 523-527 (1997).
  27. Xu G, Chen J, Jing G, Shalev A. Preventing beta-cell loss and diabetes with calcium channel blockers. *Diabetes* **61**, 848-856 (2012).
  28. Elliott WJ, Meyer PM. Incident diabetes in clinical trials of antihypertensive drugs: a network meta-analysis. *Lancet* **369**, 201-207 (2007).

29. Ahaneku JE, Taylor GO, Agbedana EO, Walker O, Salako LA. Changes in lipid and lipoprotein values during a cross-over treatment of doxazosin, moduretic and amlodipine in hypertensive patients. *J Pak Med Assoc* **44**, 166-169 (1994).
30. Pollare T, Lithell H, Morlin C, Prantare H, Hvarfner A, Ljunghall S. Metabolic effects of diltiazem and atenolol: results from a randomized, double-blind study with parallel groups. *J Hypertens* **7**, 551-559 (1989).
31. Shionoiri H, *et al.* Felodipine therapy may not alter glucose and lipid metabolism in hypertensives. Felodipine Multicenter Prospective Study Group in Japan. *Hypertension* **23**, I215-219 (1994).
32. Gradman AH. Treatment of hypertension with felodipine in patients with concomitant diseases. *Clin Cardiol* **16**, 294-301 (1993).
33. Giugliano D, *et al.* Nicardipine does not cause deterioration of glucose homoeostasis in man: a placebo controlled study in elderly hypertensives with and without diabetes mellitus. *Eur J Clin Pharmacol* **43**, 39-45 (1992).
34. Tariq AR, Maheendran K, Kamsiah J, Christina P. Dose requirement and effect of nicardipine on lipid profile in mild to moderate essential hypertensives. *Med J Malaysia* **47**, 182-189 (1992).
35. Russell JC, Koeslag DG, Dolphin PJ, Amy RM. Prevention of myocardial lesions in JCR:LA-corpulent rats by nifedipine. *Arteriosclerosis* **10**, 658-664 (1990).
36. Ohneda A, Kobayashi T, Nihei J. Effects of Ca antagonists, nifedipine, niludipine and verapamil, on endocrine function of the pancreas. *Tohoku J Exp Med* **140**, 153-159 (1983).
37. Landmark K, *et al.* Nitrendipine and mefruside in elderly hypertensives: effects on blood pressure, cardiac output, cerebral blood flow and metabolic parameters. *J Hum Hypertens* **9**, 281-285 (1995).
38. Semple CG, Thomson JA, Beastall GH, Lorimer AR. Oral verapamil does not affect glucose tolerance in non-diabetics. *Br J Clin Pharmacol* **15**, 570-571 (1983).

39. Rojdmark S, Andersson DE, Hed R, Sundblad L. Effect of verapamil on glucose response to intravenous injection of glucagon and insulin in healthy subjects. *Horm Metab Res* **12**, 285-290 (1980).
40. Kline JA, Raymond RM, Schroeder JD, Watts JA. The diabetogenic effects of acute verapamil poisoning. *Toxicol Appl Pharmacol* **145**, 357-362 (1997).
41. Eng LA, Lee JC. Verapamil induces glucose intolerance in conscious, nondiabetic rats. *Res Commun Chem Pathol Pharmacol* **48**, 157-160 (1985).
42. Wang X, Spandidos A, Wang H, Seed B. PrimerBank: a PCR primer database for quantitative gene expression analysis, 2012 update. *Nucleic Acids Res* **40**, D1144-1149 (2012).
43. Park EJ, *et al.* Dietary and genetic obesity promote liver inflammation and tumorigenesis by enhancing IL-6 and TNF expression. *Cell* **140**, 197-208 (2010).
44. Malhotra JD, *et al.* Antioxidants reduce endoplasmic reticulum stress and improve protein secretion. *Proc Natl Acad Sci U S A* **105**, 18525-18530 (2008).
45. Fasshauer M, Klein J, Neumann S, Eszlinger M, Paschke R. Hormonal regulation of adiponectin gene expression in 3T3-L1 adipocytes. *Biochemical and biophysical research communications* **290**, 1084-1089 (2002).
46. Lin JH, *et al.* IRE1 signaling affects cell fate during the unfolded protein response. *Science* **318**, 944-949 (2007).
47. Meur G, *et al.* Insulin gene mutations resulting in early-onset diabetes: marked differences in clinical presentation, metabolic status, and pathogenic effect through endoplasmic reticulum retention. *Diabetes* **59**, 653-661 (2010).
